# Supplementary material
Source: Royal Society of Chemistry journal article supplement (doi:10.1039/d6ta00988c)
Supplement: d6ta00988c1.pdf [file d6ta00988c1.pdf]

## Supporting Information

### Structure-dependent electronic modulation of Pt on perovskite surfaces: bifunctional oxygen catalysts for rechargeable Zn–air batteries

Boyeon Kim,<sup>a</sup> Kyeongwon Han,<sup>a</sup> Yuri Ko,<sup>a</sup> Chanmin Lee,<sup>\*b,c</sup> and Yukwon Jeon<sup>\*a</sup>

---

<sup>a</sup> Department of Environmental and Energy Engineering, Yonsei University, 1 Yonseidae-gil, Wonju 26493, Republic of Korea. [ykjeon@yonsei.ac.kr](mailto:ykjeon@yonsei.ac.kr)

<sup>b</sup> Green and Sustainable Materials R&D Department, Korea Institute of Industrial Technology, 89 Yangdaegiro-gil, Ipjang-myeon, Seobuk-gu, Cheonan-si 31056, Republic of Korea. [clee@kitech.re.kr](mailto:clee@kitech.re.kr)

<sup>c</sup> Department of Chemical Engineering, Chung-Ang University, Seoul 06974, Republic of Korea

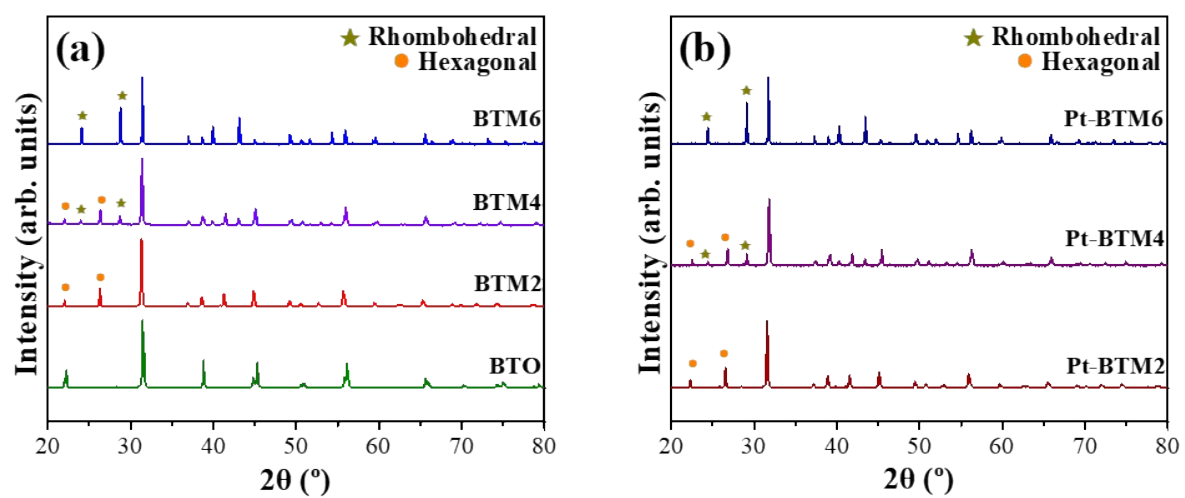

Fig. S1 XRD patterns of (a) BTM<sub>x</sub> and (b) Pt-BTM<sub>x</sub>.

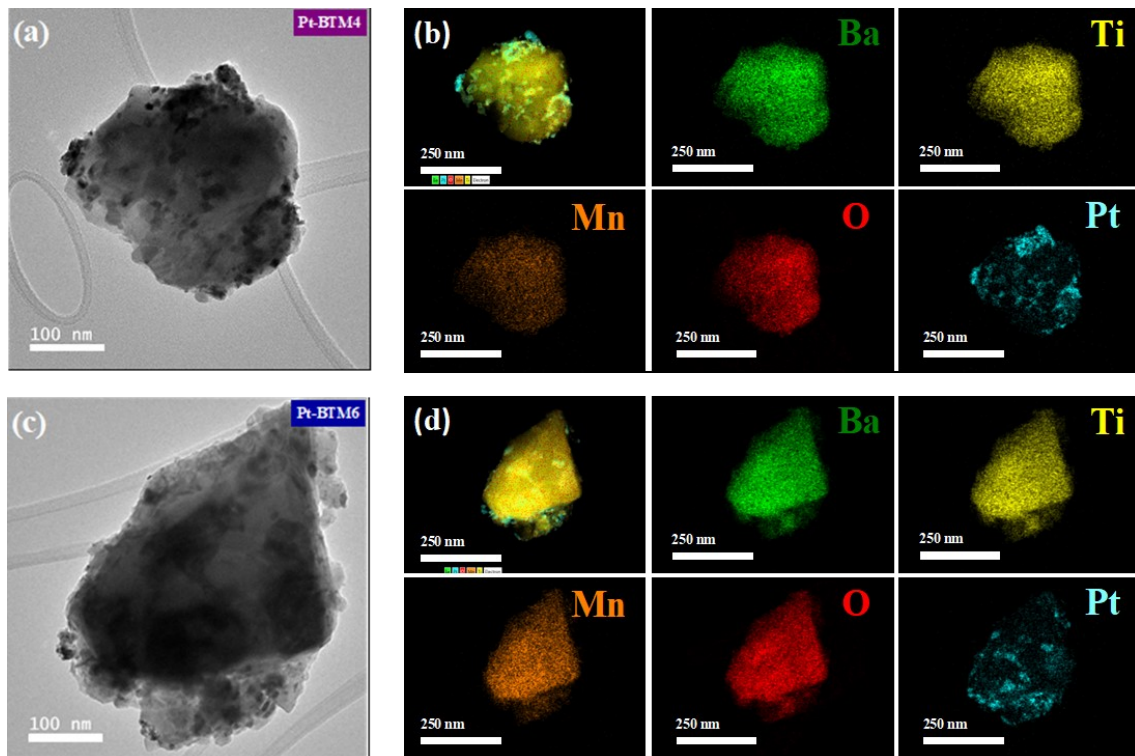

**Fig. S2** TEM and EDS chemical mapping images of (a-b) Pt-BTM4 and (c-d) Pt-BTM6.

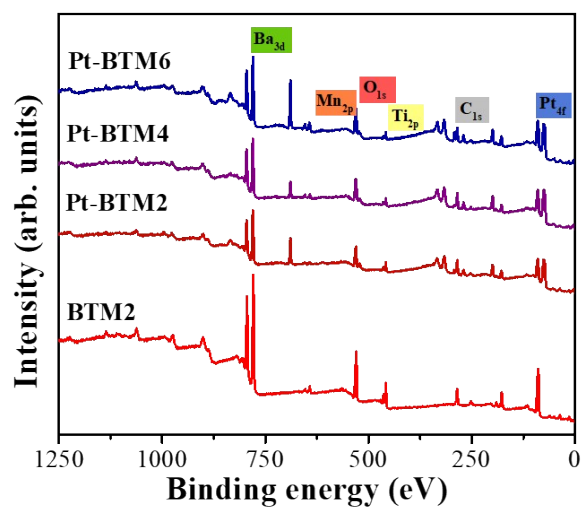

Fig. S3 Whole range XPS spectra of BTM2 and Pt-BTMx.

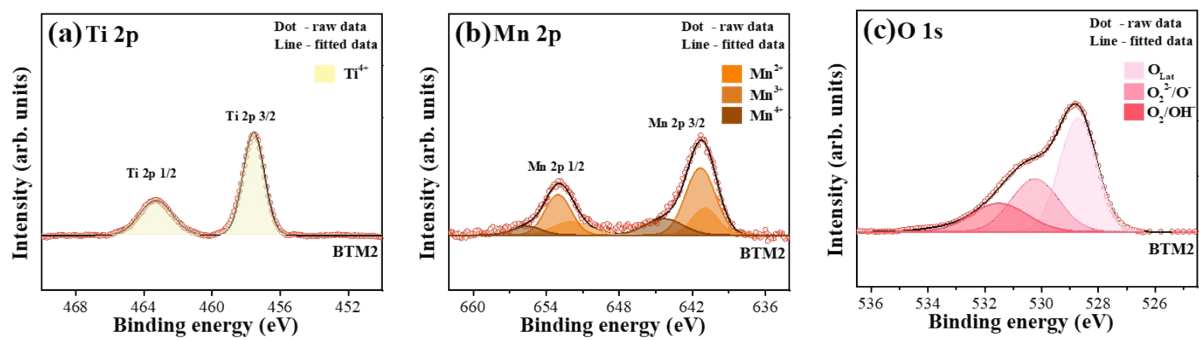

Fig. S4 High-resolution XPS spectra of BTM2, (a) Ti 2p, (b) Mn 2p and (c) O 1s.

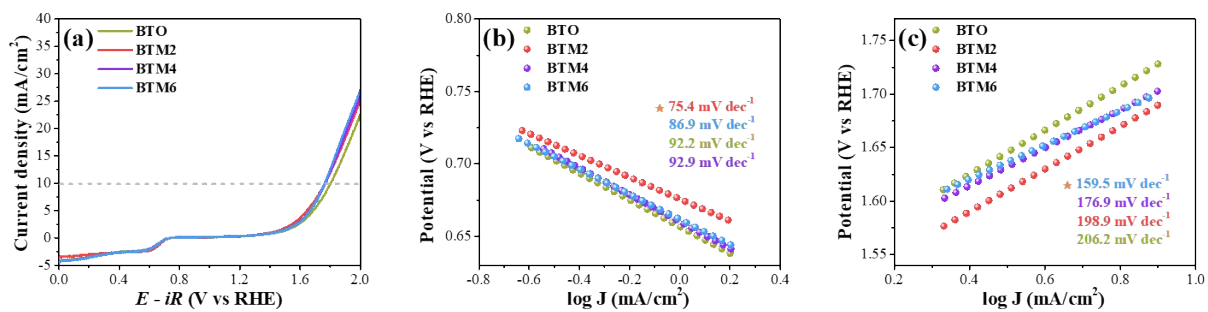

Fig. S5 (a) ORR and OER LSV plots of BTMx, (b) ORR and (c) OER Tafel plots obtained from (a).

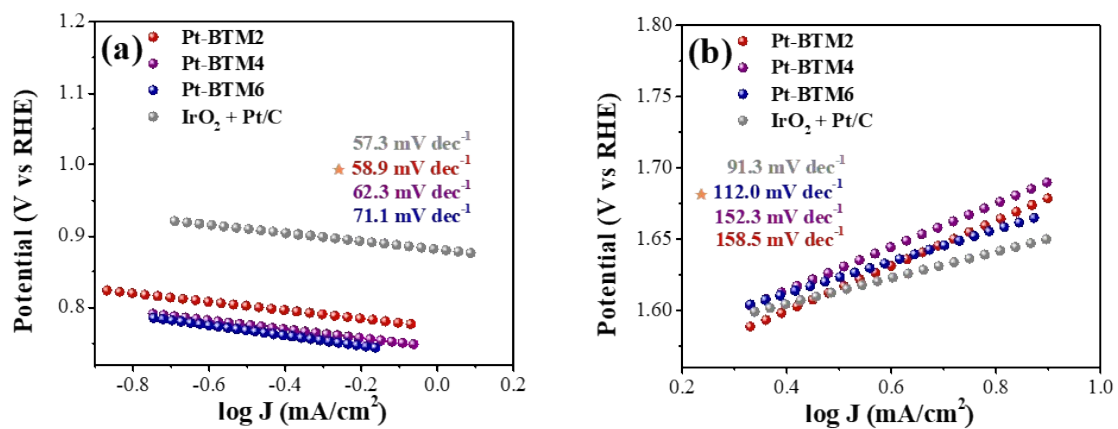

**Fig. S6** (a) ORR and (b) OER Tafel plots of Pt-BTMx and commercial catalyst obtained from LSV plots.

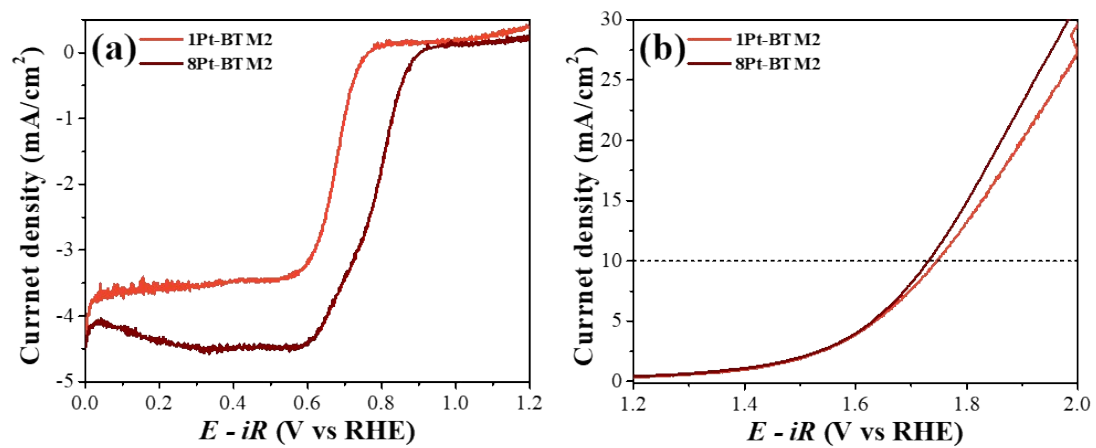

Fig. S7 LSV plots of 1wt% Pt and 8wt% Pt loaded BTM2, (a) ORR and (b) OER using RDE

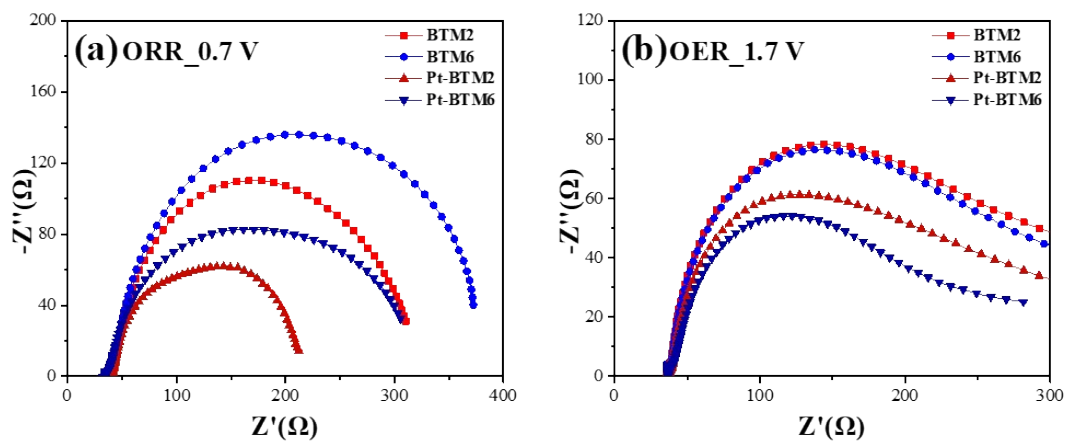

Fig. S8 EIS spectra of BTM2, BTM6, Pt-BTM2 and Pt-BTM6 potential at (a) 0.7 V and (b) 1.7 V, tested by RDE system.

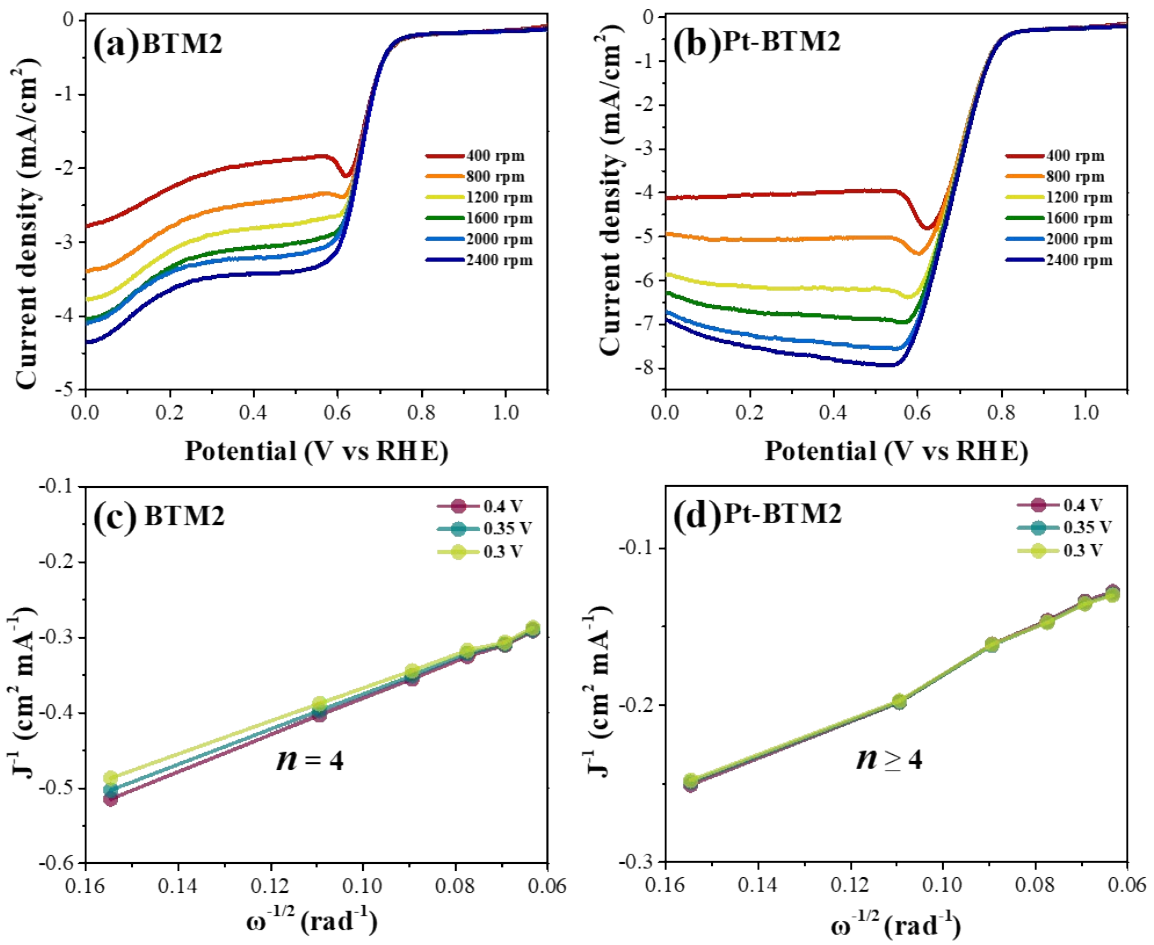

**Fig. S9** LSV curves of the (a) BTM2 and (b) Pt-BTM2 at each rotation speeds (400-2400 rpm), respectively. Corresponded K-L plots of (c) BTM2 and (d) Pt-BTM2.

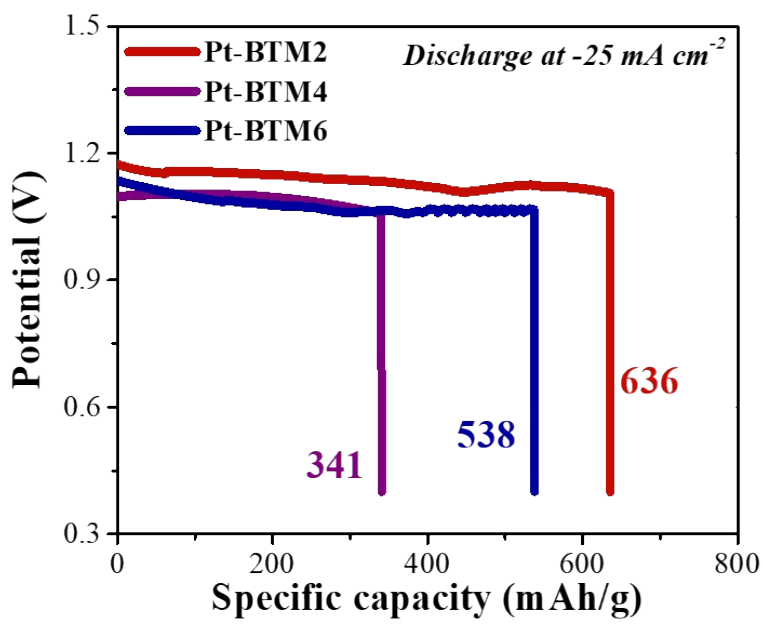

Fig. S10 Specific capacity of Pt-BTMx at a discharge current density of  $-25 \text{ mA cm}^{-2}$ .

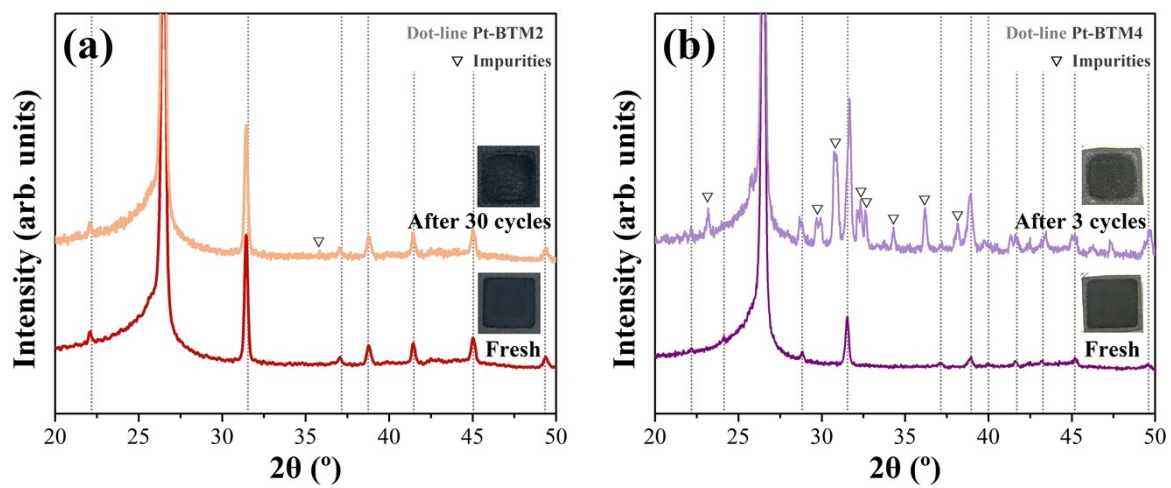

Fig. S11 XRD patterns of the fresh and long-term cycled cell bifunctional oxygen catalysts for ZAB cells, (a) Pt-BTM2 and (b) Pt-BTM4.

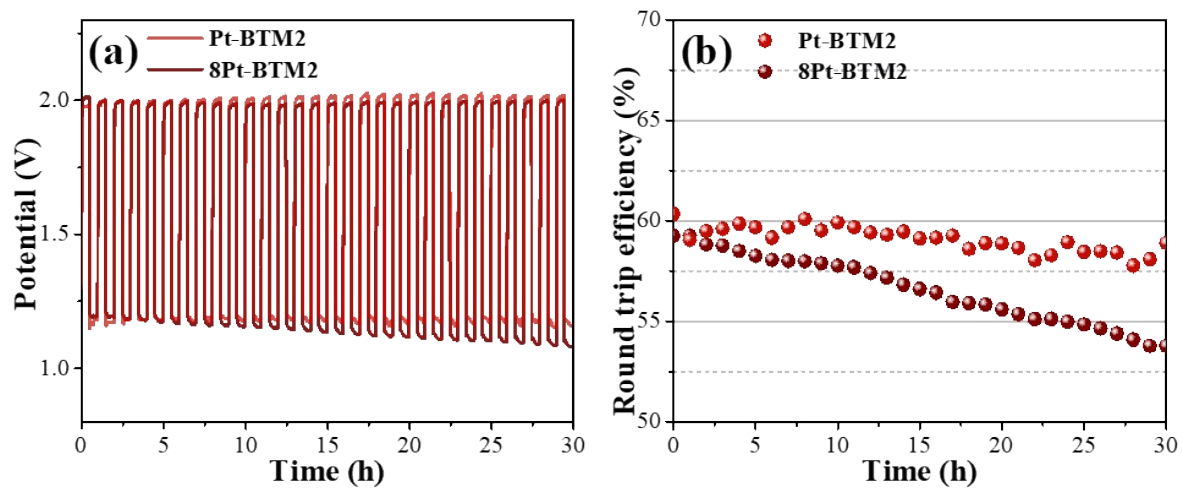

**Fig. S12** (a) Galvanostatic charge-discharge cycling long-term stability of 8wt% Pt loaded BTM2 (8Pt-BTM2) comparing with Pt-BTM2 (5Pt-BTM2), (b) RTE efficiency obtained from (a).

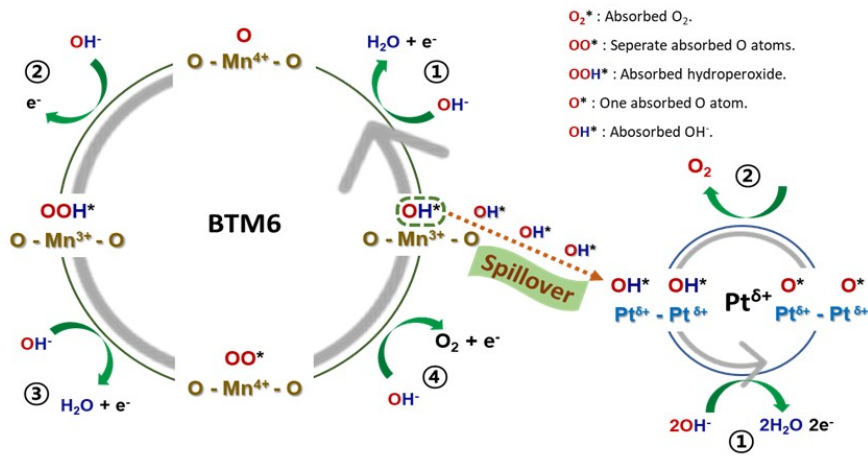

Fig. S13 OH\* spill-over mechanism on Pt-BTM6 during OER.

**Table S1.** Summary of structural refined data of BTMx.

| Catalyst | Tetragonal<br>[Å]  | Hexagonal<br>[Å]          | Rhombohedral<br>[Å]       | Refined parameters   |
|----------|--------------------|---------------------------|---------------------------|----------------------|
|          | (P4mm)             | (P6 <sub>3</sub> /mmc)    | (R3m-H)                   | R <sub>wp</sub> [%]  |
|          | (a = b ≠ c)        | (a = b ≠ c)               | (a = b ≠ c)               | R <sub>p</sub> [%]   |
|          | (α = β = γ = 90 °) | (α = β = 90 °, γ = 120 °) | (α = β = 90 °, γ = 120 °) | χ <sup>2</sup> (GOF) |
| BTO      | a = 3.9937         | -                         | -                         | 6.45                 |
|          | c = 4.0347         | -                         | -                         | 5.12                 |
|          | -                  | -                         | -                         | 1.587                |
| BTM2     | -                  | a = 5.6996                | -                         | 5.39                 |
|          | -                  | c = 13.9180               | -                         | 4.12                 |
|          | -                  | -                         | -                         | 1.712                |
| BTM4     | -                  | a = 5.6805                | a = 5.6880                | 6.21                 |
|          | -                  | c = 13.8730               | c = 27.9089               | 4.85                 |
|          | -                  | (70.8%)                   | (29.2%)                   | 1.639                |
| BTM6     | -                  | -                         | a = 5.6778                | 6.01                 |
|          | -                  | -                         | c = 27.8528               | 4.63                 |
|          | -                  | -                         | -                         | 1.685                |

**Table S2.** Comparison of Pt-BTMx elemental composition by weight ratio, obtained by EDS map sum spectrum and calculated.

| Catalyst | Pt-BTM2      |               | Pt-BTM4      |               | Pt-BTM6      |               |
|----------|--------------|---------------|--------------|---------------|--------------|---------------|
|          | EDS<br>[wt%] | Cal.<br>[wt%] | EDS<br>[wt%] | Cal.<br>[wt%] | EDS<br>[wt%] | Cal.<br>[wt%] |
| Ba       | 54.63        | 55.60         | 55.98        | 55.27         | 51.28        | 54.95         |
| Ti       | 14.65        | 15.50         | 9.78         | 11.56         | 8.75         | 7.66          |
| Mn       | 4.82         | 4.45          | 6.63         | 8.84          | 12.62        | 13.19         |
| O        | 18.77        | 19.45         | 15.68        | 19.32         | 20.5         | 19.21         |
| Pt       | 7.13         | 5.00          | 11.92        | 5.00          | 6.84         | 5.00          |
| Total    | 100.0        | 100.0         | 100.0        | 100.0         | 100.0        | 100.0         |
| Ti/Mn    | 3.04         | 3.48          | 1.48         | 1.31          | 0.69         | 0.58          |

**Table S3.** Relative concentration of components on each spectrum calculating by XPS.

| Catalyst       | Mn 2p (%)        |                  |                  | O 1s (%)         |                                              |                                 | Pt 4f (%)       |                  |                  |
|----------------|------------------|------------------|------------------|------------------|----------------------------------------------|---------------------------------|-----------------|------------------|------------------|
|                | Mn <sup>2+</sup> | Mn <sup>3+</sup> | Mn <sup>4+</sup> | O <sub>Lat</sub> | O <sub>2</sub> <sup>2-</sup> /O <sup>-</sup> | O <sub>2</sub> /OH <sup>-</sup> | Pt <sup>0</sup> | Pt <sup>2+</sup> | Pt <sup>4+</sup> |
| <b>BTM2</b>    | 23.98            | 59.49            | 16.53            | 50.53            | 30.31                                        | 19.16                           | -               | -                | -                |
| <b>Pt-BTM2</b> | 24.03            | 44.60            | 31.37            | 31.64            | 49.71                                        | 18.65                           | 33.89           | 41.52            | 24.58            |
| <b>Pt-BTM4</b> | -                | 71.82            | 28.18            | 29.32            | 52.75                                        | 17.93                           | 26.37           | 48.95            | 24.68            |
| <b>Pt-BTM6</b> | -                | 69.47            | 30.53            | 40.88            | 38.99                                        | 20.13                           | 22.75           | 58.10            | 19.15            |

**Table S4.** The tested performances of ZABs compared with commercial catalyst (IrO<sub>2</sub> + Pt/C).

| Electrocatalyst         | Resistance                     |                                  |                                 | Specific capacity<br>(mAh g <sup>-1</sup> ) | $\Delta E_{\text{Co}}$ (long-term) |              | RTE (long-term) |              |
|-------------------------|--------------------------------|----------------------------------|---------------------------------|---------------------------------------------|------------------------------------|--------------|-----------------|--------------|
|                         | R <sub>s</sub><br>( $\Omega$ ) | R <sub>int</sub><br>( $\Omega$ ) | R <sub>ct</sub><br>( $\Omega$ ) |                                             | Initial<br>(V)                     | Final<br>(V) | Initial<br>(%)  | Final<br>(%) |
| Pt-BTM2                 | 1.5                            | 0.36                             | 1.01                            | 636 <sup>a)</sup>                           | 0.82                               | 0.84         | 60.34           | 58.09        |
| Pt-BTM4                 | 1.49                           | 0.57                             | 1.18                            | 341 <sup>a)</sup>                           | 0.91                               | -            | 49.64           | -            |
| Pt-BTM6                 | 1.5                            | 0.49                             | 1.21                            | 538 <sup>a)</sup>                           | 0.82                               | 1.14         | 58.03           | 43.02        |
| IrO <sub>2</sub> + Pt/C | 1.5                            | 0.33                             | 0.98                            | 301 <sup>a)</sup>                           | 0.76                               | 1.22         | 62.67           | 38.39        |

<sup>a)</sup> Discharged at current density of -25 mA cm<sup>-2</sup>

**Table S5.** Recent performance of rechargeable ZABs with perovskite-based electrocatalyst.

| Electrocatalyst                                                                                            | Specific capacity      | PPD   | $\Delta E_{CD}$        |             | Current density | Cyclic stability | Electrolyte                            | Ref       |
|------------------------------------------------------------------------------------------------------------|------------------------|-------|------------------------|-------------|-----------------|------------------|----------------------------------------|-----------|
|                                                                                                            | (mAh g <sup>-1</sup> ) |       | (mW cm <sup>-2</sup> ) | Initial (V) |                 |                  |                                        |           |
| Pt-BTM2                                                                                                    | 763 <sup>a)</sup>      | 105.1 | 0.75                   | 0.86        | 10              | 1500 / 250       | 6 M KOH                                | This work |
| LaNi <sub>0.85</sub> Mg <sub>0.15</sub> O <sub>3</sub>                                                     | 810                    | 45    | 0.92                   | 1.3         | 10              | 110 / 110        | 6 M KOH +<br>0.2 M Zn(Ac) <sub>2</sub> | 1         |
| La <sub>0.85</sub> Ba <sub>0.15</sub> CoO <sub>3</sub>                                                     | -                      | 116.2 | 0.95                   | 0.95        | 10              | 1200 / 200       | 6 M KOH +<br>0.2 M Zn(Ac) <sub>2</sub> | 2         |
| Pr <sub>0.6</sub> Sr <sub>0.4</sub> Fe <sub>0.8</sub> Mn <sub>0.2</sub> O <sub>3-6</sub>                   | -                      | 56.3  | 0.9                    | 1.03        | 10              | 135 / 135        | 6 M KOH +<br>0.2 M Zn(Ac) <sub>2</sub> | 3         |
| Pr <sub>0.5</sub> Ba <sub>0.4</sub> Ca <sub>0.1</sub> Co <sub>0.6</sub> Fe <sub>0.4</sub> O <sub>3-6</sub> | -                      | 74.76 | 0.83                   | 0.86        | 10              | 220 / 220        | 6 M KOH +<br>0.2 M Zn(Ac) <sub>2</sub> | 4         |
| BaCo <sub>0.5</sub> Fe <sub>0.5</sub> O <sub>3-6</sub>                                                     | 820                    | 132   | 0.8                    | 0.98        | 10              | 450 / 150        | 6 M KOH +<br>0.2 M Zn(Ac) <sub>2</sub> | 5         |
| LaCo <sub>0.8</sub> Ru <sub>0.2</sub> O <sub>3-6</sub>                                                     | 433                    | 136   | 0.78                   | -           | 5               | 1440 / 240       | 6 M KOH<br>(Refill)                    | 6         |
| La <sub>0.9</sub> Ag <sub>0.1</sub> Co <sub>0.7</sub> Mn <sub>0.3</sub> O <sub>3</sub>                     | 698                    | 137.2 | 1.0 (after 300 h)      |             | 5               | 2400 / 400       | 6 M KOH +<br>0.2 M Zn(Ac) <sub>2</sub> | 7         |
| Pt-Sr(Co <sub>0.8</sub> Fe <sub>0.2</sub> ) <sub>0.95</sub> P <sub>0.05</sub> O <sub>3-6</sub> -C          | 790                    | 122   | 0.77                   | 0.86        | 5               | 240 / 80         | 6 M KOH +<br>0.2 M ZnCl <sub>2</sub>   | 8         |
| La <sub>0.5</sub> Sr <sub>0.5</sub> Co <sub>0.8</sub> Ni <sub>0.2</sub> O <sub>3</sub>                     | -                      | 71.9  | 0.8                    | 0.9         | 2               | 500 / 166        | 6 M KOH +<br>0.2 M Zn(Ac) <sub>2</sub> | 9         |
| La <sub>0.8</sub> Sr <sub>0.2</sub> Mn <sub>0.5</sub> Co <sub>0.5</sub> O <sub>3</sub> /RuO <sub>x</sub>   | -                      | 159   | 0.58                   | 0.81        | 2               | 300 / 100        | 6 M KOH +<br>0.2 M Zn(Ac) <sub>2</sub> | 10        |

<sup>a)</sup> Discharged at current density of -10 mA cm<sup>-2</sup>

## Supplementary references

1. J. Bian, R. Su, Y. Yao, J. Wang, J. Zhou, F. Li, Z. L. Wang and C. Sun, *ACS Applied Energy Materials*, 2019, **2**, 923-931.
2. H. Zhou, W. Zhao, Z. Lu, S. He, B. Yin, Y. Zheng, L. Ge and H. Chen, *Electrochimica Acta*, 2023, **462**, 142757.
3. K. Li, Z. Dong and Z. Lü, *Electrochimica Acta*, 2022, **430**, 141123.
4. K. Li, Z. Dong and Z. Lü, *Batteries*, 2022, **8**, 259.
5. A. Xu, J. Zhou, T. Liu, J. Wang, Y. Wang, D. Zhang, D. Huang, Y. Liu and X. Hu, *Catalysis Science & Technology*, 2024, **14**, 598-605.
6. S. G. Chandrappa, P. Moni, D. Chen, G. Karkera, K. R. Prakasha, R. A. Caruso and A. S. Prakash, *Journal of Materials Chemistry A*, 2020, **8**, 20612-20620.
7. Y.-X. Gao, Y. Wang, H. Liu, H.-Y. Xu, X.-P. Liu, Y.-C. Hua, C.-P. Li and J. Bai, *Journal of Alloys and Compounds*, 2025, **1010**, 178271.
8. X. Wang, J. Sunarso, Q. Lu, Z. Zhou, J. Dai, D. Guan, W. Zhou and Z. Shao, *Advanced Energy Materials*, 2020, **10**, 1903271.
9. P. Anand, M.-S. Wong and Y.-P. Fu, *Journal of Energy Storage*, 2024, **77**, 109917.
10. Y. Dai, J. Yu, Z. Zhang, S. Zhai, C. Cheng, S. Zhao, P. Tan, Z. Shao and M. Ni, *ACS Applied Materials & Interfaces*, 2021, **13**, 61098-61106.
